# Supplementary material for: Structural switching of Cu,Zn-superoxide dismutases at loop VI: insights from the crystal structure of 2-mercaptoethanol-modified enzyme
Source: PubMed Central journal article supplement — Biosci Rep. 2012 Sep 19;32(6):539–48. doi: 10.1042/BSR20120029 (PMC3497728; doi:10.1042/bsr20120029), 2012-09-19
Supplement: bsr0320539add.pdf [file bsr0320539add.pdf]

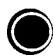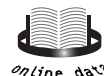

## SUPPLEMENTARY ONLINE DATA

# Structural switching of Cu,Zn-superoxide dismutases at loop VI: insights from the crystal structure of 2-mercaptoethanol-modified enzyme

Kentaro IHARA\*<sup>1</sup>, Noriko FUJIWARA†<sup>1,2</sup>, Yoshiki YAMAGUCHI‡, Hidetaka TORIGOE§, Soichi WAKATSUKI\*, Naoyuki TANIGUCHI‡ and Keiichiro SUZUKI†

\*Structural Biology Research Center, Institute of Material Structure Science, High Energy Accelerator Research Organization, Tsukuba, Ibaraki 305-0801, Japan, †Department of Biochemistry, Hyogo College of Medicine, Nishinomiya, Hyogo 663-8501, Japan, ‡Systems Glycobiology Research Group, RIKEN, Advanced Science Institute, Wako, Saitama 351-0198, Japan, and §Department of Applied Chemistry, Faculty of Science, Tokyo University of Science, Tokyo 162-8601, Japan.

See the following pages for Supplementary Figure S1 and Supplementary Tables S1–S6

<sup>1</sup> These authors contributed equally to this work.

<sup>2</sup> To whom correspondence should be addressed (email [noriko-f@hyo-med.ac.jp](mailto:noriko-f@hyo-med.ac.jp)).

The structural co-ordinates reported will appear in the Protein Data Bank under accession number 3T5W.

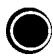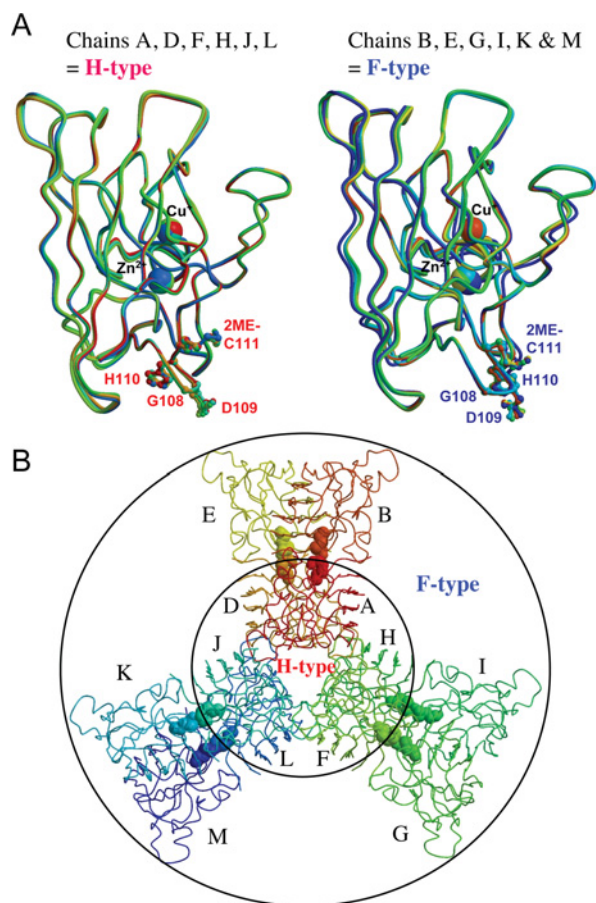

**Figure S1 H/F types of six dimers in the crystallographic asymmetric unit**

(A) Chains A (red), D (orange yellow), F (yellow green), H (green), J (green cyan) and L (blue) are superimposed using all 153 C $\alpha$  atoms as H-type. Similarly, chains B (orange), E (yellow), G (light green), I (dark green), K (cyan) and M (purple) are superimposed as F-type. C $\alpha$  atoms and side-chains of Gly<sup>108</sup>, Asp<sup>109</sup>, His<sup>110</sup> and 2-ME-Cys<sup>111</sup> are indicated as ball-and-sticks. Even the side-chains superimpose well in each type. (B) All six dimers (A/B, D/E, F/G, H/I, J/K and L/M) in the crystallographic asymmetric unit are shown and colored as in (A). H-type chains (A, D, F, H, J and L) locate inside and F-type chains (B, E, G, I, K and M) locate outside of the asymmetric group.

**Table S1 H/F typing of loop VI by comparing with chains A and B**

Rmsd of 153 C $\alpha$  atoms, distances of corresponding C $\alpha$  atom from Gly<sup>108</sup> to Cys<sup>111</sup> compared with chain A or B (Å), distances (Å) and existence of water molecule between Ser<sup>105</sup>-N and His<sup>110</sup>-O, and designated chain type.

| Chain | Compared with chain A            |                                           |                    |                    |                    | Compared with chain B            |                                           |                    |                    |                    | A- like or B- like | Distance between S <sup>105</sup> -N and H <sup>110</sup> -O (Å) | H <sub>2</sub> O | Type of loop VI |
|-------|----------------------------------|-------------------------------------------|--------------------|--------------------|--------------------|----------------------------------|-------------------------------------------|--------------------|--------------------|--------------------|--------------------|------------------------------------------------------------------|------------------|-----------------|
|       | Rmsd of 153 C $\alpha$ atoms (Å) | Distances of corresponding C $\alpha$ (Å) |                    |                    |                    | Rmsd of 153 C $\alpha$ atoms (Å) | Distances of corresponding C $\alpha$ (Å) |                    |                    |                    |                    |                                                                  |                  |                 |
|       |                                  | Gly <sup>108</sup>                        | Asp <sup>109</sup> | His <sup>110</sup> | Cys <sup>111</sup> |                                  | Gly <sup>108</sup>                        | Asp <sup>109</sup> | His <sup>110</sup> | Cys <sup>111</sup> |                    |                                                                  |                  |                 |
| A     | —                                | —                                         | —                  | —                  | —                  | 0.37                             | 0.97                                      | 2.57               | 2.61               | 0.48               | A                  | 3.24                                                             | —                | H               |
| B     | 0.37                             | 0.97                                      | 2.57               | 2.61               | 0.48               | —                                | —                                         | —                  | —                  | —                  | B                  | 4.94                                                             | +                | F               |
| D     | 0.20                             | <b>0.15</b>                               | <b>0.20</b>        | <b>0.15</b>        | <b>0.05</b>        | 0.37                             | 0.88                                      | 2.57               | 2.49               | 0.51               | A                  | 3.17                                                             | —                | H               |
| E     | 0.37                             | 0.89                                      | 2.58               | 2.64               | 0.50               | 0.15                             | <b>0.08</b>                               | <b>0.17</b>        | <b>0.13</b>        | <b>0.07</b>        | B                  | 5.06                                                             | +                | F               |
| F     | 0.28                             | <b>0.09</b>                               | <b>0.29</b>        | <b>0.07</b>        | <b>0.10</b>        | 0.42                             | 0.92                                      | 2.69               | 2.58               | 0.46               | A                  | 3.16                                                             | —                | H               |
| G     | 0.39                             | 0.76                                      | 2.44               | 2.52               | 0.50               | 0.22                             | <b>0.43</b>                               | <b>0.17</b>        | <b>0.21</b>        | <b>0.21</b>        | B                  | 4.93                                                             | +                | F               |
| H     | 0.18                             | <b>0.13</b>                               | <b>0.16</b>        | <b>0.13</b>        | <b>0.12</b>        | 0.39                             | 0.87                                      | 2.53               | 2.49               | 0.41               | A                  | 3.22                                                             | —                | H               |
| I     | 0.41                             | 0.79                                      | 2.42               | 2.48               | 0.35               | 0.23                             | <b>0.35</b>                               | <b>0.16</b>        | <b>0.16</b>        | <b>0.19</b>        | B                  | 4.89                                                             | +                | F               |
| J     | 0.18                             | <b>0.08</b>                               | <b>0.10</b>        | <b>0.15</b>        | <b>0.08</b>        | 0.36                             | 0.96                                      | 2.49               | 2.48               | 0.45               | A                  | 3.40                                                             | —                | H               |
| K     | 0.43                             | 0.94                                      | 2.72               | 2.78               | 0.47               | 0.24                             | <b>0.19</b>                               | <b>0.30</b>        | <b>0.28</b>        | <b>0.10</b>        | B                  | 5.18                                                             | +                | F               |
| L     | 0.19                             | <b>0.10</b>                               | <b>0.19</b>        | <b>0.18</b>        | <b>0.16</b>        | 0.39                             | 1.05                                      | 2.63               | 2.50               | 0.38               | A                  | 3.17                                                             | —                | H               |
| M     | 0.59                             | 0.91                                      | 2.53               | 2.55               | 0.44               | 0.48                             | <b>0.14</b>                               | <b>0.20</b>        | <b>0.14</b>        | <b>0.05</b>        | B                  | 4.64                                                             | +                | F               |

**Table S2 H/F typing of loop VI in human SOD1**

| <b>PDB</b> | <b>Mutation</b>           | <b>Type</b> | <b>ALS?</b> | <b>Monomer?</b> |
|------------|---------------------------|-------------|-------------|-----------------|
| 3T5W       | C111-2-ME (present study) | HF          |             |                 |
| 1N18       | C6A C111S                 | HF, HH      |             |                 |
| 1PU0       |                           | HH, HF      |             |                 |
| 1SPD       |                           | HF          |             |                 |
| 2GBT       | C6A C111A                 | HF          |             |                 |
| 2GBU       | C6A C111A C57A C146A      | HF          |             |                 |
| 2GBV       | C6A C111A C57A C146A      | HF, FF      |             |                 |
| 2ZKY       | G93A                      | HH, HF      | ALS         |                 |
| 3CQP       | G85R                      | HH, HF      | ALS         |                 |
| 1UXL       | I113T                     | HH, HF      | ALS         |                 |
| 2C9V       |                           | HH          |             |                 |
| 3GZO       | G93A                      | HH, HF      | ALS         |                 |
| 1AZV       | G37R                      | HH          | ALS         |                 |
| 1FUN       | C6A C111S K136E           | HH          |             |                 |
| 1HL4       |                           | HH          |             |                 |
| 1HL5       |                           | HH          |             |                 |
| 1N19       | A4V C6A C111S             | HH          | ALS         |                 |
| 10EZ       | H46R                      | HH          | ALS         |                 |
| 10ZT       | H46R                      | HH          | ALS         |                 |
| 10ZU       | C111s-oxyC S134N          | HH          | ALS         |                 |
| 1P1V       | C111s-oxyC D125H          | HH          | ALS         |                 |
| 1PTZ       | C6A C111S H43R            | HH          | ALS         |                 |
| 1SOS       | C6A C111S                 | HH          |             |                 |
| 1UXM       | A4V                       | HH, HF      | ALS         |                 |
| 2C9S       | C111s-hydroxyC            | HH          |             |                 |
| 2C9U       |                           | HH          |             |                 |
| 2NNX       | H46R H48Q                 | HH          | ALS         |                 |
| 2R27       | C6A H80S D83S C111S       | HH          |             |                 |
| 2VOA       |                           | HH          |             |                 |
| 2VR6       | G85R                      | HH          | ALS         |                 |
| 2VR7       | G85R                      | HH          | ALS         |                 |
| 2VR8       | C111s-hydroxyC G85R       | HH          | ALS         |                 |
| 2WKO       | G93A (C111s-hydroxyC)     | HH          | ALS         |                 |
| 2WZO       | L38V                      | HH          | ALS         |                 |
| 2WZ5       | L38V                      | HH          | ALS         |                 |
| 2WZ6       | G93A                      | HH          | ALS         |                 |
| 2WYT       | L38V                      | HH          | ALS         |                 |
| 2WYZ       | L38V(C111s-hydroxyC)      | HH          | ALS         |                 |
| 2ZKW       | G85R                      | HH          | ALS         |                 |
| 2ZKX       | G85R                      | HH          | ALS         |                 |
| 3CQQ       | C111s-oxyC G85R           | HH          | ALS         |                 |
| 3ECU       |                           | HH          |             |                 |
| 3ECV       | I113T                     | HH          | ALS         |                 |
| 3ECW       | T54R                      | HH          | ALS         |                 |
| 3H2P       | D124V                     | HH          | ALS         |                 |
| 3H2Q       | H80R                      | HH          | ALS         |                 |
| 3KH3       |                           | HH, FH      |             |                 |
| 3KH4       |                           | HH          |             |                 |
| 3GQF       | H46R H48Q                 | HH          | ALS         |                 |
| 3GZP       | G93A                      | HH          | ALS         |                 |
| 3GZQ       | A4V                       | HH          | ALS         |                 |

Table S2 Continued

| PDB             | Mutation                      | Type | ALS? | Monomer? |
|-----------------|-------------------------------|------|------|----------|
| 3K91            | H46R H48Q C111 pentaS-bridged | HH   | ALS  |          |
| 3QQD            | H80R C111 cysteinesulfonate   | HH   | ALS  |          |
| 1MFM            | C6A C111S F50E G51E E133Q     | F    |      | Monomer  |
| 2XJK            | C6A C111A F50E G51E           | F    |      | Monomer  |
| 2XJL            | C6A C111A F50E G51E           |      |      |          |
| H46S H48S D120S |                               | F    |      | Monomer  |
| 3HFF            | C6A C111A F50E G51E           |      |      |          |
|                 | H63S H71S H80S D83S           | F    |      | Monomer  |

Table S3 Determination of loop VI type in each chain (human SOD1)

Each two chains from the first row form a dimer.

| PDB                  | Mutation / resolution / year | ALS / monomer | Chain | Distance between S105-N and H110-O (Å) | A like or B like | H <sub>2</sub> O | Type of loop VI |
|----------------------|------------------------------|---------------|-------|----------------------------------------|------------------|------------------|-----------------|
| 3T5W (present study) | 2-ME at C111 / 1.8 / 2011    |               | A     | 3.2                                    | A                | –                | H               |
|                      |                              |               | B     | 4.9                                    | B                | +                | F               |
|                      |                              |               | D     | 3.2                                    | A                | –                | H               |
|                      |                              |               | E     | 5.1                                    | B                | +                | F               |
|                      |                              |               | F     | 3.2                                    | A                | –                | H               |
|                      |                              |               | G     | 4.9                                    | B                | +                | F               |
|                      |                              |               | H     | 3.2                                    | A                | –                | H               |
|                      |                              |               | I     | 4.9                                    | B                | +                | F               |
|                      |                              |               | J     | 3.4                                    | A                | –                | H               |
|                      |                              |               | K     | 5.2                                    | B                | +                | F               |
|                      |                              |               | L     | 3.2                                    | A                | –                | H               |
|                      |                              |               | M     | 4.6                                    | B                | +                | F               |
|                      |                              |               | 1N18  | C6A C111S / 2.0 / 2002                 |                  | A                | 4.9             |
| B                    | 3.2                          | A             |       |                                        |                  | –                | H               |
| C                    | 4.7                          | B             |       |                                        |                  | +                | F               |
| D                    | 3.3                          | A             |       |                                        |                  | –                | H               |
| E                    | 4.6                          | B             |       |                                        |                  | +                | F               |
| F                    | 3.3                          | A             |       |                                        |                  | –                | H               |
| G                    | 3.3                          | A             |       |                                        |                  | –                | H               |
| H                    | 3.3                          | A             |       |                                        |                  | –                | H               |
| I                    | 3.5                          | A             |       |                                        |                  | –                | H               |
| J                    | 3.4                          | A             |       |                                        |                  | –                | H               |
| 1PUO                 | / 1.7 / 2003                 |               | A     | 4.8                                    | B                | +                | F               |
|                      |                              |               | B     | 3.2                                    | A                | –                | H               |
|                      |                              |               | C     | 4.8                                    | B                | +                | F               |
|                      |                              |               | D     | 3.2                                    | A                | –                | H               |
|                      |                              |               | E     | 3.2                                    | A                | –                | H               |
|                      |                              |               | F     | 3.1                                    | A                | –                | H               |
|                      |                              |               | G     | 3.3                                    | A                | –                | H               |
|                      |                              |               | H     | 3.3                                    | A                | –                | H               |
|                      |                              |               | I     | 3.3                                    | A                | –                | H               |
|                      |                              |               | J     | 3.1                                    | A                | –                | H               |
| 1SPD                 | /2.4 / 1993                  |               | A     | 2.9                                    | A                | –                | H               |
|                      |                              |               | B     | 5.5                                    | B                | –                | F               |
| 2GBT                 | C6A C111A / 1.7 / 2006       |               | A     | 3.5                                    | A                | –                | H               |
|                      |                              |               | B     | 4.9                                    | B                | +                | F               |
|                      |                              |               | C     | 5.2                                    | B                | –                | F               |

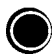**Table S3 Continued**

| <b>PDB</b> | <b>Mutation / resolution / year</b> | <b>ALS / monomer</b> | <b>Chain</b> | <b>Distance between S105-N and H110-O (Å)</b> | <b>A like or B like</b> | <b>H<sub>2</sub>O</b> | <b>Type of loop VI</b> |
|------------|-------------------------------------|----------------------|--------------|-----------------------------------------------|-------------------------|-----------------------|------------------------|
| 2GBU       | C6A C111A C57A C146A / 2.0 / 2006   |                      | D            | 3.3                                           | A                       | –                     | H                      |
|            |                                     |                      | A            | 3.6                                           | A                       | –                     | H                      |
|            |                                     |                      | B            | 4.7                                           | B                       | +                     | F                      |
|            |                                     |                      | C            | 5.1                                           | B                       | +                     | F                      |
| 2GBV       | C6A C111A C57A C146A / 2.0 / 2006   |                      | D            | 3.4                                           | A                       | –                     | H                      |
|            |                                     |                      | A            | 5.1                                           | B                       | +                     | F                      |
|            |                                     |                      | F            | 4.8                                           | B                       | –                     | F                      |
|            |                                     |                      | B            | 5.0                                           | B                       | +                     | F                      |
|            |                                     |                      | G            | 3.6                                           | A                       | –                     | H                      |
|            |                                     |                      | C            | 5.0                                           | B                       | +                     | F                      |
|            |                                     |                      | H            | 3.4                                           | A                       | –                     | H                      |
|            |                                     |                      | D            | 3.5                                           | A                       | –                     | H                      |
|            |                                     |                      | I            | 4.8                                           | B                       | –                     | F                      |
|            |                                     |                      | E            | 5.1                                           | B                       | +                     | F                      |
| 2ZKY       | G93A / 2.4 / 2008                   | ALS                  | J            | 5.1                                           | B                       | +                     | F                      |
|            |                                     |                      | A            | 3.2                                           | A                       | –                     | H                      |
|            |                                     |                      | B            | 3.3                                           | A                       | –                     | H                      |
|            |                                     |                      | C            | 4.0                                           | B                       | –                     | F                      |
|            |                                     |                      | D            | 3.2                                           | A                       | –                     | H                      |
|            |                                     |                      | E            | 3.3                                           | A                       | –                     | H                      |
|            |                                     |                      | F            | 3.2                                           | A                       | –                     | H                      |
|            |                                     |                      | G            | 3.3                                           | A                       | –                     | H                      |
|            |                                     |                      | H            | 3.5                                           | A                       | –                     | H                      |
|            |                                     |                      | I            | 3.4                                           | A                       | –                     | H                      |
| 3CQP       | G85R / 2.0 / 2008                   | ALS                  | J            | 3.0                                           | A                       | –                     | H                      |
|            |                                     |                      | A            | 3.3                                           | A                       | –                     | H                      |
|            |                                     |                      | B            | 3.1                                           | A                       | –                     | H                      |
|            |                                     |                      | C            | 3.1                                           | A                       | –                     | H                      |
| 1UXL       | I113T / 1.6 / 2004                  | ALS                  | D            | 4.6                                           | B                       | +                     | F                      |
|            |                                     |                      | A            | 5.1 & 3.3                                     | B & A                   | + & –                 | F & H                  |
|            |                                     |                      | F            | 3.3                                           | A                       | –                     | H                      |
|            |                                     |                      | B            | 5.2 & 3.9                                     | B & A                   | + & –                 | F & H                  |
|            |                                     |                      | G            | 3.2                                           | A                       | –                     | H                      |
|            |                                     |                      | C            | 3.2                                           | A                       | –                     | H                      |
|            |                                     |                      | H            | 3.2                                           | A                       | –                     | H                      |
|            |                                     |                      | D            | 3.4                                           | A                       | –                     | H                      |
|            |                                     |                      | I            | 5.3 & 3.5                                     | B & A                   | –                     | F & H                  |
|            |                                     |                      | E            | 3.2                                           | A                       | –                     | H                      |
| 2C9V       | / 1.1 / 2005                        |                      | J            | 3.3                                           | A                       | –                     | H                      |
|            |                                     |                      | A            | 3.3                                           | A                       | –                     | H                      |
|            |                                     |                      | F            | 3.2                                           | X†                      | –                     | H                      |
| 3GZO       | G93A / 2.1 / 2009                   | ALS                  | A            | 3.2                                           | A                       | –                     | H                      |
|            |                                     |                      | B            | 3.2                                           | A                       | –                     | H                      |
|            |                                     |                      | C            | 3.1                                           | A                       | –                     | H                      |
|            |                                     |                      | D            | 3.1                                           | A                       | –                     | H                      |
|            |                                     |                      | E            | 3.2                                           | A                       | –                     | H                      |
|            |                                     |                      | F            | 3.1                                           | A                       | –                     | H                      |
|            |                                     |                      | G            | 3.2                                           | A                       | –                     | H                      |

Table S3 Continued

| PDB  | Mutation / resolution / year | ALS / monomer | Chain | Distance between S105-N and H110-O (Å) | A like or B like | H <sub>2</sub> O | Type of loop VI |
|------|------------------------------|---------------|-------|----------------------------------------|------------------|------------------|-----------------|
|      |                              |               | H     | 8.5                                    | Y†               | –                | F               |
|      |                              |               | I     | 3.3                                    | A                | –                | H               |
|      |                              |               | J     | 3.2                                    | A                | –                | H               |
| 1AZV | G37R / 1.9 / 1997            | ALS           | A     | 3.3                                    | A                | –                | H               |
|      |                              |               | B     | 3.1                                    | A                | –                | H               |
| 1FUN | C6A C111S K136E / 2.9 / 1998 |               | A     | 3.4                                    | A                | –                | H               |
|      |                              |               | F     | 3.3                                    | A                | –                | H               |
|      |                              |               | B     | 3.0                                    | A                | –                | H               |
|      |                              |               | G     | 2.9                                    | A                | –                | H               |
|      |                              |               | C     | 3.0                                    | A                | –                | H               |
|      |                              |               | H     | 3.3                                    | A                | –                | H               |
|      |                              |               | D     | 3.4                                    | A                | –                | H               |
|      |                              |               | I     | 3.3                                    | A                | –                | H               |
|      |                              |               | E     | 3.6                                    | A                | –                | H               |
|      |                              |               | J     | 3.1                                    | A                | –                | H               |
| 1HL4 | / 1.8 / 2003                 |               | A     | 3.5                                    | A                | –                | H               |
|      |                              |               | B     | 3.2                                    | A                | –                | H               |
|      |                              |               | C     | 3.2                                    | A                | –                | H               |
|      |                              |               | D     | 3.4                                    | A                | –                | H               |
| 1HL5 | / 1.8 / 2003                 |               | A     | 3.2                                    | A                | –                | H               |
|      |                              |               | H     | 3.2                                    | A                | –                | H               |
|      |                              |               | B     | 3.3                                    | A                | –                | H               |
|      |                              |               | I     | 3.4                                    | A                | –                | H               |
|      |                              |               | C     | 3.1                                    | A                | –                | H               |
|      |                              |               | J     | 3.3                                    | A                | –                | H               |
|      |                              |               | D     | 3.2                                    | A                | –                | H               |
|      |                              |               | K     | 3.2                                    | A                | –                | H               |
|      |                              |               | E     | 3.2                                    | A                | –                | H               |
|      |                              |               | L     | 3.2                                    | A                | –                | H               |
|      |                              |               | F     | 3.1                                    | A                | –                | H               |
|      |                              |               | M     | 3.3                                    | A                | –                | H               |
|      |                              |               | G     | 3.0                                    | A                | –                | H               |
|      |                              |               | N     | 3.2                                    | A                | –                | H               |
|      |                              |               | O     | 3.0                                    | A                | –                | H               |
|      |                              |               | Q     | 3.2                                    | A                | –                | H               |
|      |                              |               | P     | 3.3                                    | A                | –                | H               |
|      |                              |               | S     | 3.2                                    | A                | –                | H               |
| 1N19 | A4V C6A C111S / 1.8 / 2002   | ALS           | A     | 3.3                                    | A                | –                | H               |
|      |                              |               | B     | 3.2                                    | A                | –                | H               |
| 10EZ | H46R / 2.2 / 2003            | ALS           | W     | 3.3                                    | A                | –                | H               |
|      |                              |               | X     | 3.3                                    | A                | –                | H               |
|      |                              |               | Y     | 3.1                                    | A                | –                | H               |
|      |                              |               | Z     | 3.1                                    | A                | –                | H               |
| 10ZT | H46R / 2.5 / 2003            | ALS           | G     | 3.1                                    | A                | –                | H               |
|      |                              |               | H     | 3.2                                    | A                | –                | H               |
|      |                              |               | I     | 3.2                                    | A                | –                | H               |
|      |                              |               | J     | 3.1                                    | A                | –                | H               |

**Table S3 Continued**

| <b>PDB</b> | <b>Mutation / resolution / year</b> | <b>ALS / monomer</b> | <b>Chain</b> | <b>Distance between S105-N and H110-O (Å)</b> | <b>A like or B like</b> | <b>H<sub>2</sub>O</b> | <b>Type of loop VI</b> |
|------------|-------------------------------------|----------------------|--------------|-----------------------------------------------|-------------------------|-----------------------|------------------------|
|            |                                     |                      | K            | 3.2                                           | A                       | –                     | H                      |
|            |                                     |                      | L            | 3.2                                           | A                       | –                     | H                      |
|            |                                     |                      | M            | 3.2                                           | A                       | –                     | H                      |
|            |                                     |                      | N            | 3.2                                           | A                       | –                     | H                      |
| 10ZU       | C111s – oxyC S134N / 1.3 / 2003     | ALS                  | A            | 3.2                                           | A                       | –                     | H                      |
|            |                                     |                      | B            | 3.2                                           | A                       | –                     | H                      |
| 1P1V       | C111s – oxyC D125H / 1.4 / 2003     | ALS                  | A            | 3.3                                           | A                       | –                     | H                      |
|            |                                     |                      | B            | 3.4                                           | A                       | –                     | H                      |
|            |                                     |                      | C*           | 3.3                                           | A                       | –                     | H                      |
| 1PTZ       | C6A C111S H43R / 1.8 / 2003         | ALS                  | A            | 3.4                                           | A                       | –                     | H                      |
|            |                                     |                      | B            | 3.3                                           | A                       | –                     | H                      |
| 1S0S       | C6A C111S / 2.5 / 1992              |                      | A            | 3.2                                           | A                       | –                     | H                      |
|            |                                     |                      | F            | 3.1                                           | A                       | –                     | H                      |
|            |                                     |                      | B            | 3.1                                           | A                       | –                     | H                      |
|            |                                     |                      | G            | 3.1                                           | A                       | –                     | H                      |
|            |                                     |                      | C            | 3.2                                           | A                       | –                     | H                      |
|            |                                     |                      | H            | 3.1                                           | A                       | –                     | H                      |
|            |                                     |                      | D            | 3.7                                           | A                       | –                     | H                      |
|            |                                     |                      | I            | 3.4                                           | A                       | –                     | H                      |
|            |                                     |                      | E            | 3.0                                           | A                       | –                     | H                      |
|            |                                     |                      | J            | 3.1                                           | A                       | –                     | H                      |
| 1UXM       | A4V / 1.9 / 2004                    | ALS                  | A            | 3.2                                           | A                       | –                     | H                      |
|            |                                     |                      | B            | 3.2                                           | A                       | –                     | H                      |
|            |                                     |                      | C            | 3.3                                           | A                       | –                     | H                      |
|            |                                     |                      | D            | 3.3                                           | A                       | –                     | H                      |
|            |                                     |                      | E            | 3.3                                           | A                       | –                     | H                      |
|            |                                     |                      | F            | 3.0                                           | A                       | –                     | H                      |
|            |                                     |                      | G            | 3.3                                           | A                       | –                     | H                      |
|            |                                     |                      | H            | 4.3                                           | A                       | –                     | F                      |
|            |                                     |                      | I            | 3.4                                           | A                       | –                     | H                      |
|            |                                     |                      | J            | 3.3                                           | A                       | –                     | H                      |
|            |                                     |                      | K            | 3.2                                           | A                       | –                     | H                      |
|            |                                     |                      | L            | 3.1                                           | A                       | –                     | H                      |
| 2C9S       | C111s – hydroxyC / 1.2 / 2005       |                      | A            | 3.2                                           | A                       | –                     | H                      |
|            |                                     |                      | F            | 3.3                                           | A                       | –                     | H                      |
| 2C9U       | / 1.2 / 2005                        |                      | A            | 3.2                                           | A                       | –                     | H                      |
|            |                                     |                      | F            | 3.2                                           | A                       | –                     | H                      |
| 2NNX       | H46R H48Q / 2.3 / 2006              | ALS                  | A            | 3.1                                           | A                       | –                     | H                      |
|            |                                     |                      | B            | 3.0                                           | A                       | –                     | H                      |
|            |                                     |                      | C            | 3.2                                           | A                       | –                     | H                      |
|            |                                     |                      | D            | 3.3                                           | A                       | –                     | H                      |
| 2R27       | C6A H80S D83S C111S / 2.0 / 2007    |                      | A            | 3.0                                           | A                       | –                     | H                      |
|            |                                     |                      | B            | 3.0                                           | A                       | –                     | H                      |
| 2VOA       | / 1.2 / 2007                        |                      | A            | 3.2                                           | A                       | –                     | H                      |



Table S3 Continued

| PDB  | Mutation / resolution / year            | ALS / monomer | Chain | Distance between S105-N and H110-O (Å) | A like or B like | H <sub>2</sub> O | Type of loop VI |
|------|-----------------------------------------|---------------|-------|----------------------------------------|------------------|------------------|-----------------|
| 2VR6 | G85R / 1.3 / 2008                       | ALS           | F     | 3.2                                    | A                | –                | H               |
|      |                                         |               | A     | 3.3                                    | A                | –                | H               |
|      |                                         |               | F     | 3.3                                    | A                | –                | H               |
| 2VR7 | G85R / 1.6 / 2008                       | ALS           | A     | 3.2                                    | A                | –                | H               |
|      |                                         |               | F     | 3.2                                    | A                | –                | H               |
| 2VR8 | C111S – hydroxyC G85R / 1.4 / 2008      | ALS           | A     | 3.2                                    | A                | –                | H               |
| 2WKO | G93A (C111s – hydroxyC: F) / 2.1 / 2009 | ALS           | F     | 3.2                                    | A                | –                | H               |
|      |                                         |               | A     | 3.3                                    | A                | –                | H               |
| 2ZKW | G85R / 1.9 / 2008                       | ALS           | F     | 3.1                                    | A                | –                | H               |
|      |                                         |               | A     | 3.4                                    | A                | –                | H               |
| 2ZKX | G85R / 2.7 / 2008                       | ALS           | B     | 3.4                                    | A                | –                | H               |
|      |                                         |               | A     | 3.5                                    | A                | –                | H               |
| 2WZ0 | L38V / 1.7 / 2009                       | ALS           | B     | 2.9                                    | A                | –                | H               |
|      |                                         |               | C     | 3.4                                    | A                | –                | H               |
|      |                                         |               | D     | 3.3                                    | A                | –                | H               |
|      |                                         |               | A     | 3.3                                    | A                | –                | H               |
| 2WZ5 | L38V / 1.5 / 2009                       | ALS           | F     | 3.2                                    | A                | –                | H               |
|      |                                         |               | A     | 3.2                                    | A                | –                | H               |
| 2WZ6 | G93A / 1.6 / 2009                       | ALS           | A     | 3.3                                    | A                | –                | H               |
|      |                                         |               | F     | 3.2                                    | A                | –                | H               |
| 2WYT | L38V / 1.0 / 2009                       | ALS           | A     | 3.3                                    | A                | –                | H               |
|      |                                         |               | F     | 3.2                                    | A                | –                | H               |
| 2WYZ | L38V C111s – hydroxyC / 1.7 / 2009      | ALS           | A     | 3.2                                    | A                | –                | H               |
|      |                                         |               | F     | 3.2                                    | A                | –                | H               |
| 3CQQ | C111S – oxyC G85R / 1.9 / 2008          | ALS           | A     | 3.1                                    | A                | –                | H               |
|      |                                         |               | B     | 3.2                                    | A                | –                | H               |
| 3ECU | / 1.9 / 2008                            |               | A     | 3.0                                    | A                | –                | H               |
|      |                                         |               | B     | 2.8                                    | A                | –                | H               |
|      |                                         |               | C     | 3.0                                    | A                | –                | H               |
|      |                                         |               | D     | 2.8                                    | A                | –                | H               |
| 3ECV | I113T / 1.9 / 2008                      | ALS           | A     | 3.2                                    | A                | –                | H               |
|      |                                         |               | B     | 2.8                                    | A                | –                | H               |
|      |                                         |               | C     | 2.9                                    | A                | –                | H               |
|      |                                         |               | D     | 3.0                                    | A                | –                | H               |
| 3ECW | T54R / 2.2 / 2008                       | ALS           | A     | 3.1                                    | A                | –                | H               |
|      |                                         |               | B     | 3.1                                    | A                | –                | H               |
|      |                                         |               | C     | 3.0                                    | A                | –                | H               |
|      |                                         |               | D     | 3.4                                    | A                | –                | H               |
| 3GQF | H46R H48Q / 2.2 / 2009                  | ALS           | A     | 3.2                                    | A                | –                | H               |
|      |                                         |               | B     | 3.1                                    | A                | –                | H               |
|      |                                         |               | C     | 3.2                                    | A                | –                | H               |
|      |                                         |               | D     | 3.0                                    | A                | –                | H               |
|      |                                         |               | E     | 3.1                                    | A                | –                | H               |
|      |                                         |               | F     | 3.1                                    | A                | –                | H               |

**Table S3 Continued**

| <b>PDB</b> | <b>Mutation / resolution / year</b>                                | <b>ALS / monomer</b> | <b>Chain</b> | <b>Distance between S105-N and H110-O (Å)</b> | <b>A like or B like</b> | <b>H<sub>2</sub>O</b> | <b>Type of loop VI</b> |
|------------|--------------------------------------------------------------------|----------------------|--------------|-----------------------------------------------|-------------------------|-----------------------|------------------------|
| 3GZP       | G93A / 3.1 / 2009                                                  | ALS                  | A            | 3.1                                           | A                       | –                     | H                      |
|            |                                                                    |                      | B            | 3.1                                           | A                       | –                     | H                      |
|            |                                                                    |                      | C            | 3.1                                           | A                       | –                     | H                      |
|            |                                                                    |                      | D            | 3.1                                           | A                       | –                     | H                      |
| 3GZQ       | A4V / 1.4 / 2009                                                   | ALS                  | A            | 3.1                                           | A                       | –                     | H                      |
|            |                                                                    |                      | B            | 3.2                                           | A                       | –                     | H                      |
| 3H2P       | D124V / 1.6 / 2009                                                 | ALS                  | A            | 3.2                                           | A                       | –                     | H                      |
|            |                                                                    |                      | B            | 3.3                                           | A                       | –                     | H                      |
| 3H2Q       | H80R / 1.9 / 2009                                                  | ALS                  | A            | 3.1                                           | A                       | –                     | H                      |
|            |                                                                    |                      | B            | 3.2                                           | A                       | –                     | H                      |
|            |                                                                    |                      | C            | 3.1                                           | A                       | –                     | H                      |
|            |                                                                    |                      | D            | 3.1                                           | A                       | –                     | H                      |
| 3KH3       | / 3.5 / 2009                                                       |                      | A            | 3.2                                           | A                       | –                     | H                      |
|            |                                                                    |                      | B            | 3.6                                           | A                       | –                     | H                      |
|            |                                                                    |                      | C            | 3.5                                           | A                       | –                     | H                      |
|            |                                                                    |                      | D            | 3.5                                           | A                       | –                     | H                      |
|            |                                                                    |                      | E            | 4.6                                           | B                       | –                     | F                      |
|            |                                                                    |                      | F            | 3.5                                           | A                       | –                     | H                      |
|            |                                                                    |                      | G            | 3.5                                           | A                       | –                     | H                      |
|            |                                                                    |                      | H            | 3.6                                           | A                       | –                     | H                      |
|            |                                                                    |                      | I            | 3.5                                           | A                       | –                     | H                      |
|            |                                                                    |                      | J            | 3.6                                           | A                       | –                     | H                      |
|            |                                                                    |                      | K            | 3.6                                           | A                       | –                     | H                      |
| 3KH4       | / 3.5 / 2009                                                       |                      | A            | 3.5                                           | A                       | –                     | H                      |
|            |                                                                    |                      | B            | 3.6                                           | A                       | –                     | H                      |
|            |                                                                    |                      | C            | 3.5                                           | A                       | –                     | H                      |
|            |                                                                    |                      | D            | 3.6                                           | A                       | –                     | H                      |
|            |                                                                    |                      | E            | 3.5                                           | A                       | –                     | H                      |
|            |                                                                    |                      | F            | 3.5                                           | A                       | –                     | H                      |
|            |                                                                    |                      |              |                                               |                         |                       |                        |
| 3K91       | H46R H48Q<br>C111pentaS – bridged /<br>1.8 / 2009                  | ALS                  | A            | 3.1                                           | A                       | –                     | H                      |
|            |                                                                    |                      | B            | 3.2                                           | A                       | –                     | H                      |
| 3QQD       | H80R<br>C111cysteinesulfonate<br>(C111s – oxyC: B) / 1.7 /<br>2011 | ALS                  | A            | 3.1                                           | A                       | –                     | H                      |
|            |                                                                    |                      | B            | 3.2                                           | A                       | –                     | H                      |
| 1MFM       | C6A C111S F50E G51E<br>E133Q / 1.0 / 1999                          | Monomer              | A            | 5.1                                           | B                       | +                     | F                      |
| 2XJK       | C6A C111A F50E G51E /<br>1.5 / 2010                                | Monomer              | A            | 5.2                                           | B                       | +                     | F                      |
| 2XJL       | C6A C111A F50E G51E<br>H46S H48S D120S / 1.6<br>/ 2010             | Monomer              | A            | 5.2                                           | B                       | +                     | F                      |
| 3HFF       | C6A C111A F50E G51E<br>H63S H71S H80S D83S /<br>2.2 / 2009         | Monomer              | A            | 4.6                                           | B                       | +                     | F                      |

\*C makes a dimer with a crystallographic mate  
†X and Y are neither A nor B

**Table S4 H/F typing of loop VI in eukaryotic SOD1**

| <b>PDB</b> | <b>Species/mutation</b>              | <b>Type</b> | <b>Amino acids 109–111</b> |
|------------|--------------------------------------|-------------|----------------------------|
| 1CB4       | Bovine                               | HH          | EYS                        |
| 1CBJ       | Bovine                               | HH          | EYS                        |
| 1COB       | Bovine                               | HH          | EYS                        |
| 1E90       | Bovine                               | HH          | EYS                        |
| 1E9P       | Bovine                               | HH          | EYS                        |
| 1E9Q       | Bovine                               | HH          | EYS                        |
| 1Q0E       | Bovine                               | HH          | EYS                        |
| 1SDA       | Bovine                               | HH          | EYS                        |
| 1SXA       | Bovine                               | HH          | EYS                        |
| 1SXB       | Bovine                               | HH          | EYS                        |
| 1SXC       | Bovine                               | HH          | EYS                        |
| 1SXM       | Bovine                               | HH          | EYS                        |
| 1SXS       | Bovine                               | HH          | EYS                        |
| 1SXZ       | Bovine                               | HH          | EYS                        |
| 2AEO       | Bovine                               | HH          | EYS                        |
| 2ZOW       | Bovine                               | HH          | EYS                        |
| 2SOD       | Bovine                               | HH          | EYS                        |
| 3SOD       | Bovine                               | HH          | EYS                        |
| 3HW7       | Bovine                               | HH          | EYS                        |
| 2Z7U       | Bovine/H <sub>2</sub> O <sub>2</sub> | FH          | EYS                        |
| 2Z7W       | Bovine/H <sub>2</sub> O <sub>2</sub> | FH          | EYS                        |
| 2Z7Y       | Bovine/H <sub>2</sub> O <sub>2</sub> | FH          | EYS                        |
| 2Z7Z       | Bovine/H <sub>2</sub> O <sub>2</sub> | FH          | EYS                        |
| 1B4L       | Yeast                                | FF          | PTS                        |
| 1B4T       | Yeast/H48C                           | FF          | PTS                        |
| 1F18       | Yeast/G85R                           | FF          | PTS                        |
| 1F1A       | Yeast/H48Q                           | FF          | PTS                        |
| 1F1D       | Yeast/H46C                           | FF          | PTS                        |
| 1F1G       | Yeast                                | FF          | PTS                        |
| 1JCV       | Yeast                                | FF          | PTS                        |
| 1SDY       | Yeast                                | FF          | PTS                        |
| 1YAZ       | Yeast                                | FF          | PTS                        |
| 1YSO       | Yeast                                | FF          | PTS                        |
| 2JCW       | Yeast                                | FF          | PTS                        |
| 1T04       | Schistosoma                          | HH          | SHS                        |
| 1T05       | Schistosoma                          | HH          | SHS                        |
| 3CE1       | Deep-sea yeast                       | FF          | PHS                        |
| 2Q2L       | Rosaceae                             | FF          | PHS                        |
| 3F7L       | Tubeworm                             | FF          | PDS                        |
| 3F7K       | Tubeworm                             | FF          | PDS                        |
| 1XS0       | Frog                                 | HH          | PNS                        |
| 1SRD       | Spinach                              | FF          | PNS                        |
| 3L9E       | Silkworm                             | HH          | PNS                        |
| 3L9Y       | Silkworm                             | HH          | PNS                        |
| 3KBE       | Nematode                             | FF          | PNT                        |
| 3KBF       | Nematode                             | FF          | PNT                        |
| 3GTT       | Mouse                                | HH          | EHS                        |
| 3MND       | Pig tapeworm                         | HH          | EHS                        |

**Table S5 Determination of loop VI type in each chain (eukaryotic SOD1)**

Each two chains from the first row form a dimer. \*Equivalent to the distance between S105-N and H110-O in human SOD1 residue

(a) Bovine

| PDB  | Mutation /resolution /year                                        | Chain | Distance between S103-N and Y108-O (Å)* | A-like or B-like | H <sub>2</sub> O | Type of loop VI | Amino acids 109–111 |
|------|-------------------------------------------------------------------|-------|-----------------------------------------|------------------|------------------|-----------------|---------------------|
| 1CB4 | <i>Bos taurus</i> / – / 2.3 / 1999                                | A     | 3.3                                     | A                | –                | H               | EYS                 |
|      |                                                                   | B     | 3.5                                     | A                | –                | H               | EYS                 |
| 1CBJ | <i>Bos taurus</i> / – / 1.7 / 1999                                | A     | 3.4                                     | A                | –                | H               | EYS                 |
|      |                                                                   | B     | 3.2                                     | A                | –                | H               | EYS                 |
| 1COB | <i>Bos taurus</i> / – / 2.0 / 1992                                | A     | 3.1                                     | A                | –                | H               | EYS                 |
|      |                                                                   | B     | 3.1                                     | A                | –                | H               | EYS                 |
| 1E90 | <i>Bos taurus</i> / – / 1.9 / 2000                                | A     | 3.4                                     | A                | –                | H               | EYS                 |
|      |                                                                   | B     | 3.2                                     | A                | –                | H               | EYS                 |
| 1E9P | <i>Bos taurus</i> / – / 1.7 / 2000                                | A     | 3.4                                     | A                | –                | H               | EYS                 |
|      |                                                                   | B     | 3.2                                     | A                | –                | H               | EYS                 |
| 1E9Q | <i>Bos taurus</i> / – / 1.8 / 2000                                | A     | 3.5                                     | A                | –                | H               | EYS                 |
|      |                                                                   | B     | 3.2                                     | A                | –                | H               | EYS                 |
| 1Q0E | <i>Bos taurus</i> / – / 1.2 / 2003                                | A     | 3.2                                     | A                | –                | H               | EYS                 |
|      |                                                                   | B     | 3.2                                     | A                | –                | H               | EYS                 |
| 1SDA | <i>Bos taurus</i> / – / 2.5 / 1993                                | B     | 2.8                                     | A                | –                | H               | EYS                 |
|      |                                                                   | G     | 3.2                                     | A                | –                | H               | EYS                 |
|      |                                                                   | O     | 3.3                                     | A                | –                | H               | EYS                 |
|      |                                                                   | Y     | 3.2                                     | A                | –                | H               | EYS                 |
| 1SXA | <i>Bos taurus</i> / – / 1.9 / 1995                                | A     | 3.3                                     | A                | –                | H               | EYS                 |
|      |                                                                   | B     | 3.1                                     | A                | –                | H               | EYS                 |
| 1SXB | <i>Bos taurus</i> / – / 2.0 / 1995                                | A     | 3.3                                     | A                | –                | H               | EYS                 |
|      |                                                                   | B     | 3.1                                     | A                | –                | H               | EYS                 |
| 1SXC | <i>Bos taurus</i> / – / 1.9 / 1995                                | A     | 3.3                                     | A                | –                | H               | EYS                 |
|      |                                                                   | B     | 3.1                                     | A                | –                | H               | EYS                 |
| 1SXN | <i>Bos taurus</i> / – / 1.9 / 1997                                | A     | 3.2                                     | A                | –                | H               | EYS                 |
|      |                                                                   | B     | 3.4                                     | A                | –                | H               | EYS                 |
| 1SXS | <i>Bos taurus</i> / – / 2.0 / 1998                                | A     | 3.2                                     | A                | –                | H               | EYS                 |
|      |                                                                   | B     | 3.3                                     | A                | –                | H               | EYS                 |
| 1SXZ | <i>Bos taurus</i> / – / 2.1 / 1998                                | A     | 3.2                                     | A                | –                | H               | EYS                 |
|      |                                                                   | B     | 3.2                                     | A                | –                | H               | EYS                 |
| 2AEO | <i>Bos taurus</i> / – / 1.8 / 2005                                | A     | 3.1                                     | A                | –                | H               | EYS                 |
|      |                                                                   | B     | 3.3                                     | A                | –                | H               | EYS                 |
| 2ZOW | <i>Bos taurus</i> / – / 1.5 / 2008                                | A     | 3.3                                     | A                | –                | H               | EYS                 |
|      |                                                                   | B     | 3.2                                     | A                | –                | H               | EYS                 |
| 2SOD | <i>Bos taurus</i> / – / 2.0 / 1980                                | B     | 3.2                                     | A                | –                | H               | EYS                 |
|      |                                                                   | G     | 3.5                                     | X†               | –                | H               | EYS                 |
|      |                                                                   | O     | 3.0                                     | A                | –                | H               | EYS                 |
|      |                                                                   | Y     | 3.8                                     | A                | –                | H               | EYS                 |
| 3HW7 | <i>Bos taurus</i> / – / 2.0 / 2009                                | A     | 3.3                                     | A                | –                | H               | EYS                 |
|      |                                                                   | B     | 3.1                                     | A                | –                | H               | EYS                 |
| 3SOD | <i>Bos taurus</i> / C6A / 2.1 / 1990                              | B     | 3.5                                     | A                | –                | H               | EYS                 |
|      |                                                                   | G     | 3.5                                     | A                | –                | H               | EYS                 |
|      |                                                                   | O     | 3.5                                     | A                | –                | H               | EYS                 |
|      |                                                                   | Y     | 3.5                                     | A                | –                | H               | EYS                 |
| 2Z7U | <i>Bos taurus</i> / – / 2.1 / 2007/ H <sub>2</sub> O <sub>2</sub> | A     | 3.9                                     | B                | +                | F               | EYS                 |
|      |                                                                   | B     | 3.0                                     | A                | –                | H               | EYS                 |

Table S5 Continued

| PDB  | Mutation /resolution /year                                        | Chain | Distance between S103-N and Y108-O (Å)* | A-like or B-like | H <sub>2</sub> O | Type of loop VI | Amino acids 109–111 |
|------|-------------------------------------------------------------------|-------|-----------------------------------------|------------------|------------------|-----------------|---------------------|
| 2Z7W | <i>Bos taurus</i> / – / 1.8 / 2007/ H <sub>2</sub> O <sub>2</sub> | A     | 4.2                                     | B                | –                | F               | EYS                 |
|      |                                                                   | B     | 3.2                                     | A                | –                | H               | EYS                 |
| 2Z7Y | <i>Bos taurus</i> / – / 1.6 / 2007/ H <sub>2</sub> O <sub>2</sub> | A     | 3.8                                     | B                | +                | F               | EYS                 |
|      |                                                                   | B     | 3.1                                     | A                | –                | H               | EYS                 |
| 2Z7Z | <i>Bos taurus</i> / – / 1.9 / 2007/ H <sub>2</sub> O <sub>2</sub> | A     | 4.1                                     | B                | +                | F               | EYS                 |
|      |                                                                   | B     | 3.1                                     | A                | –                | H               | EYS                 |

(b) Yeast

| PDB  | Mutation /resolution /year                          | Chain | Distance between K105-N and T110-O (Å)* | A-like or B-like | H <sub>2</sub> O | Type of loop VI | Amino acids 109–111 |
|------|-----------------------------------------------------|-------|-----------------------------------------|------------------|------------------|-----------------|---------------------|
| 1B4L | <i>Saccharomyces cerevisiae</i> / – / 1.8 / 1998    | A#    | 4.7                                     | B                | +                | F               | PTS                 |
| 1B4T | <i>Saccharomyces cerevisiae</i> / H48C / 1.8 / 1998 | A#    | 4.8                                     | B                | +                | F               | PTS                 |
| 1F18 | <i>Saccharomyces cerevisiae</i> / G85R / 1.7 / 2000 | A#    | 4.7                                     | B                | +                | F               | PTS                 |
| 1F1A | <i>Saccharomyces cerevisiae</i> / H48Q / 1.8 / 2000 | A#    | 4.7                                     | B                | +                | F               | PTS                 |
| 1F1D | <i>Saccharomyces cerevisiae</i> / H46C / 2.1 / 2000 | A#    | 4.8                                     | B                | –                | F               | PTS                 |
| 1F1G | <i>Saccharomyces cerevisiae</i> / – / 1.4 / 2000    | A     | 4.8                                     | B                | +                | F               | PTS                 |
|      |                                                     | B     | 4.8                                     | B                | +                | F               | PTS                 |
|      |                                                     | C     | 4.8                                     | B                | +                | F               | PTS                 |
|      |                                                     | D     | 4.8                                     | B                | +                | F               | PTS                 |
|      |                                                     | E     | 4.8                                     | B                | +                | F               | PTS                 |
|      |                                                     | F     | 4.8                                     | B                | +                | F               | PTS                 |
| 1JCV | <i>Saccharomyces cerevisiae</i> / – / 1.6 / 1995    | A#    | 4.7                                     | B                | +                | F               | PTS                 |
| 1SDY | <i>Saccharomyces cerevisiae</i> / – / 2.5 / 1991    | A     | 4.5                                     | B                | +                | F               | PTS                 |
|      |                                                     | B     | 4.8                                     | B                | +                | F               | PTS                 |
|      |                                                     | C     | 4.5                                     | B                | +                | F               | PTS                 |
|      |                                                     | D     | 4.8                                     | B                | –                | F               | PTS                 |
| 1YAZ | <i>Saccharomyces cerevisiae</i> / – / 1.7 / 1998    | A#    | 4.7                                     | B                | +                | F               | PTS                 |
| 1YSO | <i>Saccharomyces cerevisiae</i> / – / 1.7 / 1995    | A#    | 4.7                                     | B                | +                | F               | PTS                 |
| 2JCW | <i>Saccharomyces cerevisiae</i> / – / 1.7 / 1998    | A#    | 4.7                                     | B                | +                | F               | PTS                 |

(c) Schistosome

| PDB  | Mutation /resolution /year                  | Chain | Distance between S104-N and H109-O (Å)* | A-like or B-like | H <sub>2</sub> O | Type of loop VI | Amino acids 109–111 |
|------|---------------------------------------------|-------|-----------------------------------------|------------------|------------------|-----------------|---------------------|
| 1T04 | <i>Schistosoma mansoni</i> / – / 1.6 / 2004 | A     | 3.3                                     | A                | –                | H               | SHS                 |

**Table S5 Continued**

| PDB  | Mutation /resolution /year                  | Chain | Distance between S104-N and H109-O (Å)* | A-like or B-like | H <sub>2</sub> O | Type of loop VI | Amino acids 109–111 |
|------|---------------------------------------------|-------|-----------------------------------------|------------------|------------------|-----------------|---------------------|
| 1T05 | <i>Schistosoma mansoni</i> / – / 2.2 / 2004 | B     | 3.3                                     | A                | –                | H               | SHS                 |
|      |                                             | C     | 3.3                                     | A                | –                | H               | SHS                 |
|      |                                             | D     | 3.3                                     | A                | –                | H               | SHS                 |
|      |                                             | A     | 3.3                                     | A                | –                | H               | SHS                 |
|      |                                             | B     | 3.2                                     | A                | –                | H               | SHS                 |
|      |                                             | C     | 3.3                                     | A                | –                | H               | SHS                 |
|      |                                             | D     | 3.1                                     | A                | –                | H               | SHS                 |

(d) Deep – sea yeast

| PDB  | Mutation /resolution /year                        | Chain | Distance between S109-N and H114-O (Å)* | A-like or B-like | H <sub>2</sub> O | Type of loop VI | Amino acids 109–111 |
|------|---------------------------------------------------|-------|-----------------------------------------|------------------|------------------|-----------------|---------------------|
| 3CE1 | <i>Cryptococcus liquefaciens</i> / – / 1.2 / 2008 | A#    | 3.9                                     | Y†               | –                | F               | PHS                 |

(e) Rosaceae

| PDB  | Mutation /resolution /year                       | Chain | Distance between P104-N and N109-O (Å)* | A-like or B-like | H <sub>2</sub> O | Type of loop VI | Amino acids 109–111 |
|------|--------------------------------------------------|-------|-----------------------------------------|------------------|------------------|-----------------|---------------------|
| 2Q2L | <i>Potentilla atrosanguinea</i> / – / 2.4 / 2007 | A     | 4.2                                     | B                | –                | F               | PHS                 |
|      |                                                  | B     | 4.6                                     | B                | –                | F               | PHS                 |

(f) Tubeworm

| PDB  | Mutation /resolution /year                  | Chain | Distance between K103-N and T108-O (Å)* | A-like or B-like | H <sub>2</sub> O | Type of loop VI | Amino acids 109–111 |
|------|---------------------------------------------|-------|-----------------------------------------|------------------|------------------|-----------------|---------------------|
| 3F7L | <i>Alvinella pompejana</i> / – / 1.0 / 2008 | A#    | 4.1                                     | B                | +                | F               | PDS                 |
| 3F7K | <i>Alvinella pompejana</i> / – / 1.4 / 2008 | A#    | 4.09 (4.37)                             | B                | +                | F               | PDS                 |

(g) Frog

| PDB  | Mutation /resolution /year             | Chain | Distance between S103-N and N108-O (Å)* | A-like or B-like | H <sub>2</sub> O | Type of loop VI | Amino acids 109–111 |
|------|----------------------------------------|-------|-----------------------------------------|------------------|------------------|-----------------|---------------------|
| 1XSO | <i>Xenopus laevis</i> / – / 1.5 / 1995 | A     | 3.4                                     | A                | –                | H               | PNS                 |
|      |                                        | B     | 3.4                                     | A                | –                | H               | PNS                 |

Table S5 Continued

(h) Spinach

| PDB  | Mutation /resolution /year                | Chain | Distance between P103-N and N108-O (Å)* | A-like or B-like | H <sub>2</sub> O | Type of loop VI | Amino acids 109–111 |
|------|-------------------------------------------|-------|-----------------------------------------|------------------|------------------|-----------------|---------------------|
| 1SRD | <i>Spinacea oleracea</i> / – / 2.0 / 1993 | A     | 4.4                                     | B                | –                | F               | PNS                 |
|      |                                           | B     | 4.6                                     | B                | –                | F               | PNS                 |
|      |                                           | C     | 4.4                                     | B                | –                | F               | PNS                 |
|      |                                           | D     | 4.5                                     | B                | –                | F               | PNS                 |

(i) Silkworm

| PDB  | Mutation /resolution /year                   | Chain | Distance between S105-N and N110-O (Å)* | A-like or B-like | H <sub>2</sub> O | Type of loop VI | Amino acids 109–111 |
|------|----------------------------------------------|-------|-----------------------------------------|------------------|------------------|-----------------|---------------------|
| 3L9E | <i>Bombyx mori</i> / – / 2.1 / 2010          | A     | 3.2                                     | A                | –                | H               | PNS                 |
|      |                                              | B     | 3.1                                     | A                | –                | H               | PNS                 |
|      |                                              | C     | 3.2                                     | A                | –                | H               | PNS                 |
|      |                                              | D     | 3.1                                     | A                | –                | H               | PNS                 |
| 3L9Y | <i>Bombyx mori</i> / S92A H131N / 1.8 / 2010 | A     | 3.2                                     | A                | –                | H               | PNS                 |
|      |                                              | B     | 3.3                                     | A                | –                | H               | PNS                 |

(j) Nematode

| PDB  | Mutation /resolution /year                     | Chain | Distance between T104-N and N109-O (Å)* | A-like or B-like | H <sub>2</sub> O | Type of loop VI | Amino acids 109–111 |
|------|------------------------------------------------|-------|-----------------------------------------|------------------|------------------|-----------------|---------------------|
| 3KBE | <i>Caenorhabditis elegans</i> / – / 1.1 / 2009 | A#    | 4.8                                     | B                | +                | F               | PNT                 |
| 3KBF | <i>Caenorhabditis elegans</i> / – / 1.3 / 2009 | A#    | 5.0                                     | B                | +                | F               | PNT                 |

(k) Mouse

| PDB  | Mutation /resolution /year           | Chain | Distance between S105-N and H110-O (Å)* | A-like or B-like | H <sub>2</sub> O | Type of loop VI | Amino acids 109–111 |
|------|--------------------------------------|-------|-----------------------------------------|------------------|------------------|-----------------|---------------------|
| 3GTT | <i>Mus musculus</i> / – / 2.4 / 2009 | A     | 3.1                                     | A                | –                | H               | EHF                 |
|      |                                      | B     | 3.7                                     | A                | –                | H               | EHF                 |
|      |                                      | C     | 3.0                                     | A                | –                | H               | EHF                 |
|      |                                      | D     | 3.2                                     | A                | –                | H               | EHF                 |
|      |                                      | E     | 3.2                                     | A                | –                | H               | EHF                 |
|      |                                      | F     | 3.0                                     | A                | –                | H               | EHF                 |

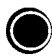**Table S5 Continued**

(l) Pig tapeworm

| PDB  | Mutation / resolution / year          | Chain | Distance between S102-N and H107-O (Å)* | A-like or B-like | H <sub>2</sub> O | Type of loop VI | Amino acids 109–111 |
|------|---------------------------------------|-------|-----------------------------------------|------------------|------------------|-----------------|---------------------|
| 3MND | <i>Taenia solium</i> / – / 2.2 / 2010 | A     | 3.2                                     | A                | –                | H               | EHS                 |
|      |                                       | B     | 3.1                                     | A                | –                | H               | EHS                 |

#A makes a dimer with a crystallographic mate.

†X and Y are neither A nor B.

**Table S6 Determination of loop VI type in each chain (prokaryotic SOD1)**

(a)

| PDB  | Mutation / resolution / year                                 | Chain | Distance between S146-N and L153-O (Å)* | A-like or B-like | H <sub>2</sub> O | Type of loop VI | Amino acids 108 – 111     |
|------|--------------------------------------------------------------|-------|-----------------------------------------|------------------|------------------|-----------------|---------------------------|
| 1S4I | <i>Bacillus subtilis</i> / – / 1.8 / 2004 (monomer)          | A     | 2.9                                     | A                | –                | H               | KGSKLN<br>(KG: insertion) |
|      |                                                              | B     | 2.8                                     | A                | –                | H               |                           |
|      |                                                              | C     | 2.8                                     | A                | –                | H               |                           |
|      |                                                              | D     | 2.9                                     | A                | –                | H               |                           |
| 1XTL | <i>Bacillus subtilis</i> / P104H / 2.0 / 2004 (monomer)      | A     | 2.8                                     | A                | –                | H               | KGSKLN<br>(KG: insertion) |
|      |                                                              | B     | 2.9                                     | A                | –                | H               |                           |
|      |                                                              | C     | 2.8                                     | A                | –                | H               |                           |
|      |                                                              | D     | 3.0                                     | A                | –                | H               |                           |
| 1XTM | <i>Bacillus subtilis</i> / Y88H P104H / 1.6 / 2004 (monomer) | A     | 3.1                                     | A                | –                | H               | KGSKLN<br>(KG: insertion) |
|      |                                                              | B     | 2.9                                     | A                | –                | H               |                           |

(b)

| PDB  | Mutation / resolution / year                            | Chain               | Amino acids |
|------|---------------------------------------------------------|---------------------|-------------|
| 2APS | <i>Actinobacillus pleuropneumoniae</i> / – / 1.9 / 1999 | AB (type 2 dimer)   | Δ108–110    |
| 2AQM | <i>Brucella abortus</i> / – / 1.1 / 2005                | A (monomer)         | Δ108–110    |
| 1ESO | <i>Escherichia coli</i> / – / 2.0 / 1997                | A (monomer)         | Δ108–110    |
| 1Z9N | <i>Haemophilus ducreyi</i> / – / 1.5 / 2005             | ABCD (type 2 dimer) | Δ108–110    |
| 1Z9P | <i>Haemophilus ducreyi</i> / – / 1.5 / 2005             | AB (type 2 dimer)   | Δ108–110    |
| 1PZS | <i>Mycobacterium tuberculosis</i> / – / 1.6 / 2003      | A (type 3 dimer)    | Δ108–110    |



Table S6 Continued

| PDB  | Mutation / resolution / year                           | Chain               | Amino acids |
|------|--------------------------------------------------------|---------------------|-------------|
| 2AQN | <i>Neisseria meningitidis</i> / – / 1.4 / 2005         | ABC* (type 2 dimer) | Δ108–110    |
| 2AQP | <i>Neisseria meningitidis</i> / E73A / 1.3 / 2005      | AB (type 2 dimer)   | Δ108–110    |
| 2AAQ | <i>Neisseria meningitidis</i> / K91E / 1.7 / 2005      | ABC* (type 2 dimer) | Δ108–110    |
| 2AQR | <i>Neisseria meningitidis</i> / K91Q / 1.8 / 2005      | ABC* (type 2 dimer) | Δ108–110    |
| 2AQS | <i>Neisseria meningitidis</i> / K91E K94E / 1.7 / 2005 | AB (type 2 dimer)   | Δ108–110    |
| 2AQT | <i>Neisseria meningitidis</i> / K91Q K94Q / 1.8 / 2005 | ABC* (type 2 dimer) | Δ108–110    |
| 1BZO | <i>Photobacterium leiognathi</i> / – / 2.1 / 1998      | A# (type 1 dimer)   | Δ108–110    |
| 1IB5 | <i>Photobacterium leiognathi</i> / W83Y / 2.5 / 2001   | A# (type 1 dimer)   | Δ108–110    |
| 1YAI | <i>Photobacterium leiognathi</i> / – / 1.9 / 1996      | ABC* (type 1 dimer) | Δ108–110    |
| 1EQW | <i>Salmonella typhimurium</i> / – / 2.3 / 2000         | ABCD (type 2 dimer) | Δ108–110    |
| 2WWN | <i>Yersinia pseudotuberculosis</i> / – / 2.6 / 2009    | AB (type 2 dimer)   | Δ108–110    |
| 2WWO | <i>Yersinia pseudotuberculosis</i> / – / 2.4 / 2009    | AB (type 2 dimer)   | Δ108–110    |

\*C makes a dimer with a crystallographic mate.

#A makes a dimer with a crystallographic mate.

Received 20 April 2012/29 June 2012; accepted 16 July 2012

Published as Immediate Publication 18 July 2012, doi 10.1042/BSR20120029
